# Supplementary material for: Pituitary Suppression with Gonadotropin-Releasing Hormone Agonist Prior to Artificial Endometrial Preparation in Frozen–Thawed Embryo Transfer Cycles: A Systematic Review and Meta-Analysis of Different Protocols and Infertile Populations
Source: MDPI journal article supplement (doi:10.3390/biomedicines12040760), 2024-03-29
Supplement: s1 [file s1]

**Supplementary Table S1. PRISMA 2020 checklist**

| Section and Topic             | Item # | Checklist item                                                                                                                                                                                                                                                                                       | Location where item is reported               |
|-------------------------------|--------|------------------------------------------------------------------------------------------------------------------------------------------------------------------------------------------------------------------------------------------------------------------------------------------------------|-----------------------------------------------|
| <b>TITLE</b>                  |        |                                                                                                                                                                                                                                                                                                      |                                               |
| Title                         | 1      | Identify the report as a systematic review.                                                                                                                                                                                                                                                          | Line 1-5                                      |
| <b>ABSTRACT</b>               |        |                                                                                                                                                                                                                                                                                                      |                                               |
| Abstract                      | 2      | See PRISMA 2020 for Abstracts checklist.                                                                                                                                                                                                                                                             | Line 18-47                                    |
| <b>INTRODUCTION</b>           |        |                                                                                                                                                                                                                                                                                                      |                                               |
| Rationale                     | 3      | Describe the rationale for the review in the context of existing knowledge.                                                                                                                                                                                                                          | Line 42-96                                    |
| Objectives                    | 4      | Provide an explicit statement of the objective(s) or question(s) the review addresses.                                                                                                                                                                                                               | Line 91-96                                    |
| <b>METHODS</b>                |        |                                                                                                                                                                                                                                                                                                      |                                               |
| Eligibility criteria          | 5      | Specify the inclusion and exclusion criteria for the review and how studies were grouped for the syntheses.                                                                                                                                                                                          | Line 99-131                                   |
| Information sources           | 6      | Specify all databases, registers, websites, organisations, reference lists and other sources searched or consulted to identify studies. Specify the date when each source was last searched or consulted.                                                                                            | Line 104-110                                  |
| Search strategy               | 7      | Present the full search strategies for all databases, registers and websites, including any filters and limits used.                                                                                                                                                                                 | Line 99-131 and Supplementary Table 2         |
| Selection process             | 8      | Specify the methods used to decide whether a study met the inclusion criteria of the review, including how many reviewers screened each record and each report retrieved, whether they worked independently, and if applicable, details of automation tools used in the process.                     | Line 111-123                                  |
| Data collection process       | 9      | Specify the methods used to collect data from reports, including how many reviewers collected data from each report, whether they worked independently, any processes for obtaining or confirming data from study investigators, and if applicable, details of automation tools used in the process. | Line 117-131                                  |
| Data items                    | 10a    | List and define all outcomes for which data were sought. Specify whether all results that were compatible with each outcome domain in each study were sought (e.g., for all measures, time points, analyses), and if not, the methods used to decide which results to collect.                       | Line 127-131                                  |
|                               | 10b    | List and define all other variables for which data were sought (e.g., participant and intervention characteristics, funding sources). Describe any assumptions made about any missing or unclear information.                                                                                        | Line 127-131                                  |
| Study risk of bias assessment | 11     | Specify the methods used to assess risk of bias in the included studies, including details of the tool(s) used, how many reviewers assessed each study and whether they worked independently, and if applicable, details of automation tools used in the process.                                    | Line 136-148 and Figure 2                     |
| Effect measures               | 12     | Specify for each outcome the effect measure(s) (e.g., risk ratio, mean difference) used in the synthesis or presentation of results.                                                                                                                                                                 | Line 135-162                                  |
| Synthesis methods             | 13a    | Describe the processes used to decide which studies were eligible for each synthesis (e.g., tabulating the study intervention characteristics and comparing against the planned groups for each synthesis (item #5)).                                                                                | Line 135-162                                  |
|                               | 13b    | Describe any methods required to prepare the data for presentation or synthesis, such as handling of missing summary statistics, or data conversions.                                                                                                                                                | Line 135-162                                  |
|                               | 13c    | Describe any methods used to tabulate or visually display results of individual studies and syntheses.                                                                                                                                                                                               | Line 135-162                                  |
|                               | 13d    | Describe any methods used to synthesize results and provide a rationale for the choice(s). If meta-analysis was performed, describe the model(s), method(s) to identify the presence and extent of statistical heterogeneity, and software package(s) used.                                          | Line 135-162                                  |
|                               | 13e    | Describe any methods used to explore possible causes of heterogeneity among study results (e.g., subgroup analysis, meta-regression).                                                                                                                                                                | Line 135-162                                  |
|                               | 13f    | Describe any sensitivity analyses conducted to assess robustness of the synthesized results.                                                                                                                                                                                                         | Line 135-162                                  |
| Reporting bias assessment     | 14     | Describe any methods used to assess risk of bias due to missing results in a synthesis (arising from reporting biases).                                                                                                                                                                              | Line 135-162                                  |
| Certainty assessment          | 15     | Describe any methods used to assess certainty (or confidence) in the body of evidence for an outcome.                                                                                                                                                                                                | Line 135-162                                  |
| <b>RESULTS</b>                |        |                                                                                                                                                                                                                                                                                                      |                                               |
| Study selection               | 16a    | Describe the results of the search and selection process, from the number of records identified in the search to the number of studies included in the review, ideally using a flow diagram.                                                                                                         | Line 156-164, Figure 2, Supplementary Table 2 |
|                               | 16b    | Cite studies that might appear to meet the inclusion criteria, but which were excluded,                                                                                                                                                                                                              | Line 170-180                                  |

| Section and Topic                              | Item # | Checklist item                                                                                                                                                                                                                                                                        | Location where item is reported                                         |
|------------------------------------------------|--------|---------------------------------------------------------------------------------------------------------------------------------------------------------------------------------------------------------------------------------------------------------------------------------------|-------------------------------------------------------------------------|
|                                                |        | and explain why they were excluded.                                                                                                                                                                                                                                                   |                                                                         |
| Study characteristics                          | 17     | Cite each included study and present its characteristics.                                                                                                                                                                                                                             | Table 1                                                                 |
| Risk of bias in studies                        | 18     | Present assessments of risk of bias for each included study.                                                                                                                                                                                                                          | Line 197-202, and Figure 2                                              |
| Results of individual studies                  | 19     | For all outcomes, present, for each study: (a) summary statistics for each group (where appropriate) and (b) an effect estimate and its precision (e.g., confidence/credible interval), ideally using structured tables or plots.                                                     | Line 203-278                                                            |
| Results of syntheses                           | 20a    | For each synthesis, briefly summarise the characteristics and risk of bias among contributing studies.                                                                                                                                                                                | Line 203-278                                                            |
|                                                | 20b    | Present results of all statistical syntheses conducted. If meta-analysis was done, present for each the summary estimate and its precision (e.g., confidence/credible interval) and measures of statistical heterogeneity. If comparing groups, describe the direction of the effect. | Line 203-278                                                            |
|                                                | 20c    | Present results of all investigations of possible causes of heterogeneity among study results.                                                                                                                                                                                        | Line 203-278 and supplementary table 4                                  |
|                                                | 20d    | Present results of all sensitivity analyses conducted to assess the robustness of the synthesized results.                                                                                                                                                                            | Line 203-278 and supplementary table 4, Supplementary Figure 1, 2 and 3 |
| Reporting biases                               | 21     | Present assessments of risk of bias due to missing results (arising from reporting biases) for each synthesis assessed.                                                                                                                                                               | Line 203-278 and supplementary table 4, Supplementary Figure 1, 2 and 3 |
| Certainty of evidence                          | 22     | Present assessments of certainty (or confidence) in the body of evidence for each outcome assessed.                                                                                                                                                                                   | Line 203-278                                                            |
| <b>DISCUSSION</b>                              |        |                                                                                                                                                                                                                                                                                       |                                                                         |
| Discussion                                     | 23a    | Provide a general interpretation of the results in the context of other evidence.                                                                                                                                                                                                     | Line 280-285                                                            |
|                                                | 23b    | Discuss any limitations of the evidence included in the review.                                                                                                                                                                                                                       | Line 317-389                                                            |
|                                                | 23c    | Discuss any limitations of the review processes used.                                                                                                                                                                                                                                 | Line 340-373                                                            |
|                                                | 23d    | Discuss implications of the results for practice, policy, and future research.                                                                                                                                                                                                        | Line 360-373                                                            |
| <b>OTHER INFORMATION</b>                       |        |                                                                                                                                                                                                                                                                                       |                                                                         |
| Registration and protocol                      | 24a    | Provide registration information for the review, including register name and registration number, or state that the review was not registered.                                                                                                                                        | Line 132-134                                                            |
|                                                | 24b    | Indicate where the review protocol can be accessed, or state that a protocol was not prepared.                                                                                                                                                                                        | Line 132-134                                                            |
|                                                | 24c    | Describe and explain any amendments to information provided at registration or in the protocol.                                                                                                                                                                                       |                                                                         |
| Support                                        | 25     | Describe sources of financial or non-financial support for the review, and the role of the funders or sponsors in the review.                                                                                                                                                         | Line 424                                                                |
| Competing interests                            | 26     | Declare any competing interests of review authors.                                                                                                                                                                                                                                    | Line 427                                                                |
| Availability of data, code and other materials | 27     | Report which of the following are publicly available and where they can be found: template data collection forms; data extracted from included studies; data used for all analyses; analytic code; any other materials used in the review.                                            | Supplementary Table 2                                                   |

From: Page MJ, McKenzie JE, Bossuyt PM, Boutron I, Hoffmann TC, Mulrow CD, et al. The PRISMA 2020 statement: an updated guideline for reporting systematic reviews. *BMJ* 2021;372:n71. doi: 10.1136/bmj.n71

**Supplementary Table S2.** Detailed search strategy for electronic database searches  
(Searches performed on 30<sup>th</sup> August 2022)

| No | Databases (4)  | Search term                                                                                                                                                                                                                                        | Total results (1333) |
|----|----------------|----------------------------------------------------------------------------------------------------------------------------------------------------------------------------------------------------------------------------------------------------|----------------------|
| 1  | Google Scholar | (pituitary suppression OR GNRHa OR gonadotropin releasing hormone agonist) AND (FET OR frozen-thawed embryo transfer) AND (Artificial cycle OR HRT OR Hormonal replacement therapy OR HRC OR Hormonal replacement cycle)                           | 1129                 |
| 2  | EMBASE         | (pituitary suppression OR GNRHa OR gonadotropin releasing hormone agonist) AND (FET OR frozen-thawed embryo transfer) AND (Artificial cycle OR HRT OR Hormonal replacement therapy OR HRC OR Hormonal replacement cycle)                           | 103                  |
| 3  | PubMed         | (pituitary suppression OR GNRHa OR gonadotropin releasing hormone agonist) AND (FET OR frozen-thawed embryo transfer) AND (Artificial cycle OR HRT OR Hormonal replacement therapy OR HRC OR Hormonal replacement cycle)                           | 65                   |
| 4  | Cochrane       | (pituitary suppression OR GNRHa OR gonadotropin releasing hormone agonist) AND (FET OR frozen-thawed embryo transfer) AND (Artificial cycle OR HRT OR Hormonal replacement therapy OR HRC OR Hormonal replacement cycle) in Title Abstract Keyword | 42                   |

**Supplementary Table S3:** Inclusion and exclusion criteria of the studies in the systematic review and meta-analysis

| ID | Author                | Inclusion Criteria                                                                                                                                  | Exclusion Criteria                                                                                                                                                                                                              |
|----|-----------------------|-----------------------------------------------------------------------------------------------------------------------------------------------------|---------------------------------------------------------------------------------------------------------------------------------------------------------------------------------------------------------------------------------|
| 1  | Simon A. (1998)       | (i) Women with <b>functioning ovaries</b><br>(ii) Autologous FET                                                                                    | NR                                                                                                                                                                                                                              |
| 2  | Prato L. D. (2002)    | (i) Women from 25 to 38 years old<br>(ii) Tubal, idiopathic, or male factors<br>(iii) Autologous FET                                                | (i) Women with < 2 embryos cryopreserved<br>(ii) Women with all embryos cryopreserved because of ovarian hyperstimulation risk                                                                                                  |
| 3  | El-Toukhy T. (2004)   | (i) Women with regular menstrual cycle<br>(ii) Autologous FET                                                                                       | (i) FET cycle with donated embryo(s)                                                                                                                                                                                            |
| 4  | Davar R. (2007)       | (i) Women < 30 years old<br>(ii) Regular menstruation<br>(iii) Undergoing autologous FET                                                            | NR                                                                                                                                                                                                                              |
| 5  | Niu Z. (2013)         | (i) Women aged 38 years or less<br>(ii) History of $\leq 1$ past failed FET<br>(iii) Normal uterine cavity<br>(iv) Having adenomyosis               | (i) Presence of hydrosalpinxes<br>(ii) Severe endometriosis<br>(iii) History of myomectomy                                                                                                                                      |
| 6  | Vijiver A. (2014)     | (i) Women aged 39 years or less<br>(ii) Underwent one or more FER cycle with same protocol for endometrial preparation (no cross-over)              | (i) FET cycle with donated embryo(s)                                                                                                                                                                                            |
| 7  | Nekoo E. A. (2015)    | (i) Infertile women from male factor<br>(ii) 20-37 years old<br>(iii) Regular menstruation<br>(iv) Undergoing autologous FET                        | NR                                                                                                                                                                                                                              |
| 8  | Hebisha S. (2016)     | (i) Women undergoing autologous FET with long agonist COS protocol                                                                                  | NR                                                                                                                                                                                                                              |
| 9  | Guo S. (2016)         | (i) Age $\leq 40$<br>(ii) Undergoing FET<br>(iii) Cleavages transferred                                                                             | (i) Age > 40<br>(ii) Concurrent endometriosis or fibroids<br>(iii) Blastocyst transplantation                                                                                                                                   |
| 10 | Tsai H. W. (2017)     | (i) Infertile women with polycystic ovarian syndrome (PCOS)<br>(ii) From 20 to 45 years old<br>(iii) Autologous FET                                 | (i) Using hormonal therapy<br>(ii) Severe physical or mental illness<br>(iii) Had pregnancy or breastfeeding in 6 weeks before<br>(iv) Congenital adrenal hyperplasia, Cushing's syndrome or androgen-selecting neoplasm        |
| 11 | Kang J. (2018)        | (i) Regular menstrual cycle (24–35 days)<br>(ii) 21–45 years of age<br>(iii) Autologous FET                                                         | (i) PCOS<br>(ii) FET with PGT embryo(s)<br>(iii) Oocytes donation<br>(iv) Endometriosis stage IV or history of uterine synechiae                                                                                                |
| 12 | Movahedi. S. (2018)   | (i) Women from 25 to 38 years old<br>(ii) Functioning ovaries and normal uterus cavity<br>(iii) Autologous FET                                      | (i) Age > 39 years old<br>(ii) FSH > 11<br>(iii) Endometriosis or hypothalamic amenorrhea                                                                                                                                       |
| 13 | Samsami A. (2018)     | (i) Women from 20 to 39 years old<br>(ii) Autologous FET<br>(iii) Women from GnRH $\alpha$ group had embryo(s) from long GnRH $\alpha$ COS cycle(s) | (i) High grade endometriosis<br>(ii) Uterine myoma or adhesion<br>(iii) BMI < 18 or > 29 kg/m <sup>2</sup>                                                                                                                      |
| 14 | Wageh A. (2018)       | (i) PCOS (ii) autologous FET                                                                                                                        | NR                                                                                                                                                                                                                              |
| 15 | Xie D. (2018)         | (i) Autologous FET cycles                                                                                                                           | (i) blastocyst embryo(s)<br>(ii) repeated thin endometrium (<7 mm) (iii) women with karyotype abnormalities                                                                                                                     |
| 16 | Madani T. (2019)      | (i) Age 20-37<br>(ii) Normal menstruation cycle<br>(iii) BMI < 30<br>(iv) First FET cycle                                                           | (i) Embryo donation<br>(ii) Uterine malformation<br>(iii) Hyperprolactinemia<br>(iv) Thyroid disorders<br>(v) Ovulation disorders<br>(vi) History of recurrent miscarriage<br>(vii) Tuberculosis<br>(viii) Severe endometriosis |
| 17 | Mehrafza M. (2019)    | (i) All FET case                                                                                                                                    | (i) Thin endometrium<br>(ii) Homogenous hyperechogenic endometrium                                                                                                                                                              |
| 18 | Wang Z. (2019)        | (i) Patients with endometrial polyps and undergoing FET                                                                                             | NR                                                                                                                                                                                                                              |
| 19 | Aghahoseini M. (2020) | (i) Infertile women 18-40 years old<br>(ii) BMI $\leq 30$ kg/m <sup>2</sup><br>(iii) PCOS diagnosed using Rotterdam criteria                        | (i) Being treated with hormones or drugs<br>(ii) Having severe physical or mental illness<br>(iii) Having congenital adrenal hyperplasia or androgen-secreting neoplasm<br>(iv) Having uterine abnormalities                    |
| 20 | An J. (2020)          | (i) 21-40 years old<br>(ii) Regular menstruation<br>(iii) $\geq 2$ cryopreserved embryos                                                            | (i) FET cycles with PGT<br>(ii) Endometriosis, uterine malformations, hydrosalpinx or a history of intrauterine adhesions                                                                                                       |
| 21 | Davar R. (2020)       | (i) History of idiopathic RIF (at least two implantation failures)                                                                                  | (i) Endometrial polyp, uterine myoma, and uterine anomaly                                                                                                                                                                       |
| 22 | Dong M. (2020)        | (i) 38-45 years old                                                                                                                                 | (i) FET with PGT<br>(ii) Blastocysts from cryopreserved or donated oocytes                                                                                                                                                      |

|     |                              |                                                                                                                                                       |                                                                                                                                                                                                                                                                                                                                                                                                                                                                                                                                                                                                                     |
|-----|------------------------------|-------------------------------------------------------------------------------------------------------------------------------------------------------|---------------------------------------------------------------------------------------------------------------------------------------------------------------------------------------------------------------------------------------------------------------------------------------------------------------------------------------------------------------------------------------------------------------------------------------------------------------------------------------------------------------------------------------------------------------------------------------------------------------------|
|     |                              | (ii) First autologous FET cycles with ICSI embryo(s)                                                                                                  | (iii) Thin endometrium on FET day<br>(iv) Non-AC cycles<br>(v) Fresh cycle transplantation, history of repeated abortions, congenital uterine malformations                                                                                                                                                                                                                                                                                                                                                                                                                                                         |
| 23  | Guerrero-Vargas J. J. (2020) | (i) Autologous FET cycles                                                                                                                             | (i) Progesterone >1.5 ng/dl on day of triggering in natural cycle<br>(ii) Untreated endometrial fluid, polyps or submucosal fibroids<br>(iii) No inflammation or infection of the genital tract                                                                                                                                                                                                                                                                                                                                                                                                                     |
| 24  | Naserpoor L. (2020)          | (i) Women undergoing FET                                                                                                                              | NR                                                                                                                                                                                                                                                                                                                                                                                                                                                                                                                                                                                                                  |
| 25  | Qi Q. (2020)                 | (i) All women undergoing FET using AC protocol                                                                                                        | NR                                                                                                                                                                                                                                                                                                                                                                                                                                                                                                                                                                                                                  |
| 26  | Li M. (2021)                 | (i) Women ≤ 45 years old undergoing 1st autologous FET cycle<br>(ii) Having adenomyosis                                                               | (i) Malformations of reproductive system without therapy<br>(ii) Hydrosalpinx, PCOS, endometriosis, malignant diseases of reproductive system<br>(iii) Parental chromosomal abnormality                                                                                                                                                                                                                                                                                                                                                                                                                             |
| 27  | Liu X. (2021)                | (i) Women undergoing 1st autologous FET cycle<br>(ii) Having PCOS diagnosed using Rotterdam criteria                                                  | (i) Women with multiple FET                                                                                                                                                                                                                                                                                                                                                                                                                                                                                                                                                                                         |
| 28  | Luo L. (2021)                | (i) Women 20-40 years old<br>(ii) PCOS diagnosed using Rotterdam criteria<br>(iii) < 3 blastocysts transferred                                        | (i) Women with other causes of ovulation dysfunction and hyperandrogenism<br>(ii) Anatomical uterine abnormalities<br>(iii) Women with PGT embryo(s) or contraindications to AC therapy<br>(iv) Endometriosis, adenomyosis, RIF, recurrent pregnancy loss (three or more times)<br>(v) Parental chromosomal abnormalities<br>(vi) Thin endometrium after ≥ days of estrogen administration                                                                                                                                                                                                                          |
| 29  | Salama K. M.(2021)           | (i) Age 22-40 years<br>(ii) BMI < 36 kg/m2                                                                                                            | (i) Gross uterine and tubal pathology<br>(ii) Endometrial thickness ≤ 7 mm at the time of embryo transfer<br>(iii) Poor quality of embryos after thawing<br>(iv) Refusal to participate in the study at any step of the cycle.                                                                                                                                                                                                                                                                                                                                                                                      |
| 30  | Salemi S. (2021)             | (i) Age <37<br>(ii) PCOS<br>(iii) Autologous FET<br>(iv) Normal uterine cavity                                                                        | (i) Testicular sperm ICSI<br>(ii) Basal FSH > 12 IU/L<br>(iii) Egg donor or surrogates<br>(iv) Hydrosalpinx, uterine anomalies, submucousal myoma, blastocyst transfer                                                                                                                                                                                                                                                                                                                                                                                                                                              |
| 31  | Siristatidis C. (2021)       | (i) Age 25–42 years<br>(ii) BMI ≤ 35 and ≥19<br>(iii) Normo-ovulatory patients                                                                        | (i) Poor ovarian response according to the Bologna criteria<br>(ii) PCOS patients according to the Rotterdam criteria<br>(iii) Patients using donor oocytes and gestational carriers                                                                                                                                                                                                                                                                                                                                                                                                                                |
| 32  | Xu J. (2021)                 | (i) Women aged 20–38 years<br>(ii) All embryos were vitrified with at least two high-quality day 3 embryos<br>(iii) Undergoing ET for the first time. | (i) FET cycles after pre-implantation genetic testing<br>(ii) Patients with congenital or acquired uterine malformations, intrauterine adhesion, laparoscopic findings suggesting endometriosis, ultrasound findings suggesting adenomyosis, intramural uterine leiomyoma (≥3 cm), submucosal fibroids, scarred uterus, endometrial polyp, hydrosalpinx, PCOS, recurrent abortions (defined as three or more previous spontaneous pregnancy losses)<br>(iii) Abnormal results on parental karyotyping<br>(iv) Medical conditions that contraindicated assisted reproductive technology (ART) treatment or pregnancy |
| 33  | Zheng Q. Z. (2021)           | (i) Completed FET cycles                                                                                                                              | (i) No embryos for transferred<br>(ii) FET with PGT-A<br>(iii) Cycles with mixed embryos from different ovarian stimulation cycles or different embryo stage<br>(iv) Cycles lost to follow up                                                                                                                                                                                                                                                                                                                                                                                                                       |
| 34  | Eleftheriadou A. (2022)      | (i) First FET cycles                                                                                                                                  | (i) FET with PGT                                                                                                                                                                                                                                                                                                                                                                                                                                                                                                                                                                                                    |
| 35a | Xia L. (2022)*               | (i) Completed AC-FET cycles without a history of implantation failure(s)                                                                              | (i) Endometriosis<br>(ii) Adenomyosis<br>(iii) PCOS<br>(iv) Endometritis<br>(v) Intrauterine adhesions<br>(vi) Uterine malformation<br>(vii) Untreated hydrosalpinx                                                                                                                                                                                                                                                                                                                                                                                                                                                 |
| 35b | Xia L. (2022)**              | (i) Completed AC-FET cycles with 1 previous failed implantation                                                                                       | (i) Endometriosis<br>(ii) Adenomyosis<br>(iii) PCOS<br>(iv) Endometritis<br>(v) Intrauterine adhesions<br>(vi) Uterine malformation<br>(vii) Untreated hydrosalpinx                                                                                                                                                                                                                                                                                                                                                                                                                                                 |
| 35c | Xia L. (2022)***             | (i) Completed AC-FET cycles with > 1 previous failed implantation                                                                                     | (i) Endometriosis<br>(ii) Adenomyosis<br>(iii) PCOS<br>(iv) Endometritis<br>(v) Intrauterine adhesions<br>(vi) Uterine malformation                                                                                                                                                                                                                                                                                                                                                                                                                                                                                 |

|                                                                           |                  |                                                                                                                |                                                                                                                                                                                                                                                                                                                                                                                                                                                                                                                  |
|---------------------------------------------------------------------------|------------------|----------------------------------------------------------------------------------------------------------------|------------------------------------------------------------------------------------------------------------------------------------------------------------------------------------------------------------------------------------------------------------------------------------------------------------------------------------------------------------------------------------------------------------------------------------------------------------------------------------------------------------------|
|                                                                           |                  |                                                                                                                | (vii) Untreated hydrosalpinx                                                                                                                                                                                                                                                                                                                                                                                                                                                                                     |
| 36                                                                        | Li L. (2022)     | (i) 18-40 years old<br>(ii) Regular menstrual cycle of 26-35 days<br>(iii) Undergoing autologous AC-FET cycles | (i) Contraindication to estrogen or progesterone (prior thrombosis, hormone-sensitive malignancy, porphyria...)<br>(ii) Intrauterine adhesions<br>(iii) Congenital uterine abnormalities<br>(iv) Recipients of oocyte donation programs                                                                                                                                                                                                                                                                          |
| 37                                                                        | Pan D. (2022)    | (i) Patients 36-43 years old<br>(ii) Undergoing third ET attempt or higher                                     | (i) Adenomyosis or endometriosis<br>(ii) Thin endometrium < 7mm on day of ET<br>(iii) Recipients of oocyte donation program                                                                                                                                                                                                                                                                                                                                                                                      |
| 38                                                                        | Wang Y. (2022)   | (i) PCOS patients undergoing AC-FET                                                                            | (i) Other causes of hyperandrogenism and ovulation dysfunction<br>(ii) Congenital or acquired uterine malformations<br>(iii) Endometriosis and adenomyosis<br>(iv) Intrauterine adhesions<br>(v) History of recurrent miscarriage<br>(vi) FET cycles with PGT                                                                                                                                                                                                                                                    |
| 39                                                                        | Gan R. X. (2022) | (i) Infertile women with cesarean scar                                                                         | (i) > 40 years of age at oocyte retrieval<br>(ii) History of multiple cesarean scars and impaired cesarean scar healing<br>(iii) Recurrent spontaneous abortion, recurrent implantation failure<br>(iv) Reimplantation genetic testing<br>(v) Previous uterine myomectomy or operative hysteroscopy for intrauterine adhesions, thin endometrium (< 7 mm on the day of embryo transfer), untreated hydrosalpinx, adenomyosis, autoimmune or endocrine disease<br>(vi) Missing records in the electronic database |
| 40                                                                        | Mo M. (2022)     | (i) Women with a clear history of IUA and underwent an intrauterine adhesion serration procedure               | (i) Cycle with no autologous embryo(s) or cycle with PGT embryo<br>(ii) Cycle with embryo coming from different IVF cycles<br>(iii) Cycle lost to follow up                                                                                                                                                                                                                                                                                                                                                      |
| 41                                                                        | Liu Y. (2022)    | (i) Patients with a 2-time <8mm endometrium on the day of oocyte retrieval or day of P4 administration         | (i) Endometrium-related diseases including uterine malformations, uterine myoma, endometrial polyps, intrauterine adhesion, genital tuberculosis, and hydrosalpinx                                                                                                                                                                                                                                                                                                                                               |
| AC: artificial cycle, HRT: hormonal replacement therapy, NR: Non-Reported |                  |                                                                                                                |                                                                                                                                                                                                                                                                                                                                                                                                                                                                                                                  |

**Supplementary Table S4.** Sensitive analysis for outcomes with publication biases.

| (A) In general population                       |                    |                  |        |                     |                  |        |                         |        |                      |                       |                  |        |                     |                  |        |                         |        |
|-------------------------------------------------|--------------------|------------------|--------|---------------------|------------------|--------|-------------------------|--------|----------------------|-----------------------|------------------|--------|---------------------|------------------|--------|-------------------------|--------|
| Outcome                                         | Overall            |                  |        |                     |                  |        |                         |        |                      | Exclusion of outliers |                  |        |                     |                  |        |                         |        |
|                                                 | Fixed effect model |                  |        | Random effect model |                  |        | I2                      | p      | Egger's test p-value | Fixed effect model    |                  |        | Random effect model |                  |        | I2                      | p      |
|                                                 | OR/MD              | 95%CI            | p      | OR/MD               | 95%CI            | p      |                         |        |                      | OR/MD                 | 95%CI            | p      | OR/MD               | 95%CI            | p      |                         |        |
| CPR                                             | 1.1338             | [1.0825; 1.1875] | <0.001 | 1.2664              | [1.1164; 1.4364] | <0.001 | 69.4%<br>[58.3%; 77.5%] | <0.001 | 0.013                | 1.1700                | [1.1106; 1.2326] | <0.001 | 1.1942              | [1.0959; 1.3013] | <0.001 | 38.5%<br>[10.3%; 57.9%] | 0.0073 |
| IR                                              | 1.187              | [1.1288; 1.2482] | <0.001 | 1.2446              | [1.0712; 1.4461] | 0.006  | 70.3%<br>[56.1%; 79.9%] | <0.001 | 0.3517               | -                     | -                | -      | -                   | -                | -      | -                       | -      |
| MR                                              | 1.0148             | [0.9334; 1.1033] | 0.7304 | 0.8581              | [0.6839; 1.0768] | 0.1799 | 52.9%<br>[31.2%; 67.8%] | <0.001 | 0.0065               | 0.9189                | [0.8248; 1.0238] | 0.1252 | 0.9022              | [0.7809; 1.0423] | 0.1561 | 19.2%<br>[0.0%; 48.0%]  | 0.1702 |
| LBR                                             | 1.1003             | [1.0474; 1.1559] | <0.001 | 1.3088              | [1.0717; 1.5985] | 0.01   | 78.0%<br>[68.4%; 84.6%] | <0.001 | 0.002                | 1.1865                | [1.1143; 1.2633] | <0.001 | 1.2230              | [1.0866; 1.3767] | 0.0025 | 52.3%<br>[23.9%; 70.0%] | 0.0016 |
| (B) In women with PCOS diagnosis                |                    |                  |        |                     |                  |        |                         |        |                      |                       |                  |        |                     |                  |        |                         |        |
| Outcome                                         | Overall            |                  |        |                     |                  |        |                         |        |                      | Exclusion of outliers |                  |        |                     |                  |        |                         |        |
|                                                 | Fixed effect model |                  |        | Random effect model |                  |        | I2                      | p      | Egger's test p-value | Fixed effect model    |                  |        | Random effect model |                  |        | I2                      | p      |
|                                                 | OR/MD              | 95%CI            | p      | OR/MD               | 95%CI            | p      |                         |        |                      | OR/MD                 | 95%CI            | p      | OR/MD               | 95%CI            | p      |                         |        |
| CPR                                             | 1.2379             | [1.0646; 1.4395] | 0.0056 | 1.2346              | [1.0062; 1.5148] | 0.0446 | 29.1%<br>[0.0%; 65.0%]  | 0.1687 | 0.4367               | -                     | -                | -      | -                   | -                | -      | -                       | -      |
| IR                                              | 1.2840             | [1.0009; 1.6472] | 0.0492 | 1.3502              | [0.4631; 3.9370] | 0.3508 | 71.4%<br>[3.1%; 91.6%]  | 0.0302 | 0.2627               | -                     | -                | -      | -                   | -                | -      | -                       | -      |
| MR                                              | 0.7451             | [0.5862; 0.9471] | 0.0162 | 0.6577              | [0.3277; 1.3202] | 0.1981 | 44.9%<br>[0.0%; 75.6%]  | 0.0795 | 0.1893               | -                     | -                | -      | -                   | -                | -      | -                       | -      |
| LBR                                             | 1.2199             | [1.0476; 1.4206] | 0.0105 | 1.2197              | [0.9222; 1.6133] | 0.1274 | 48.6%<br>[0.0%; 79.6%]  | 0.0833 | 0.6499               | -                     | -                | -      | -                   | -                | -      | -                       | -      |
| (C) In women with reported regular menstruation |                    |                  |        |                     |                  |        |                         |        |                      |                       |                  |        |                     |                  |        |                         |        |
| Outcome                                         | Overall            |                  |        |                     |                  |        |                         |        |                      | Exclusion of outliers |                  |        |                     |                  |        |                         |        |
|                                                 | Fixed effect model |                  |        | Random effect model |                  |        | I2                      | p      | Egger's test p-value | Fixed effect model    |                  |        | Random effect model |                  |        | I2                      | p      |
|                                                 | OR/MD              | 95%CI            | p      | OR/MD               | 95%CI            | p      |                         |        |                      | OR/MD                 | 95%CI            | p      | OR/MD               | 95%CI            | p      |                         |        |
| CPR                                             | 1.5592             | [1.3355; 1.8202] | <0.001 | 1.6285              | [0.9784; 2.7106] | 0.06   | 76.7%<br>[53.5%; 88.3%] | <0.001 | 0.7394               | -                     | -                | -      | -                   | -                | -      | -                       | -      |
| IR                                              | 1.4225             | [1.2169; 1.6627] | <0.001 | 1.3051              | [0.8387; 2.0308] | 0.1823 | 60.7%<br>[3.7%; 83.9%]  | 0.0262 | 0.4821               | -                     | -                | -      | -                   | -                | -      | -                       | -      |
| MR                                              | 0.7523             | [0.5512; 1.0269] | 0.0730 | 0.5635              | [0.1950; 1.6284] | 0.2341 | 73.3%<br>[42.6%; 87.6%] | 0.0010 | 0.2307               | -                     | -                | -      | -                   | -                | -      | -                       | -      |
| LBR                                             | 1.7059             | [1.4315; 2.0329] | <0.001 | 2.1262              | [0.8213; 5.5045] | 0.0970 | 86.6%<br>[73.0%; 93.3%] | <0.001 | 0.2330               | -                     | -                | -      | -                   | -                | -      | -                       | -      |

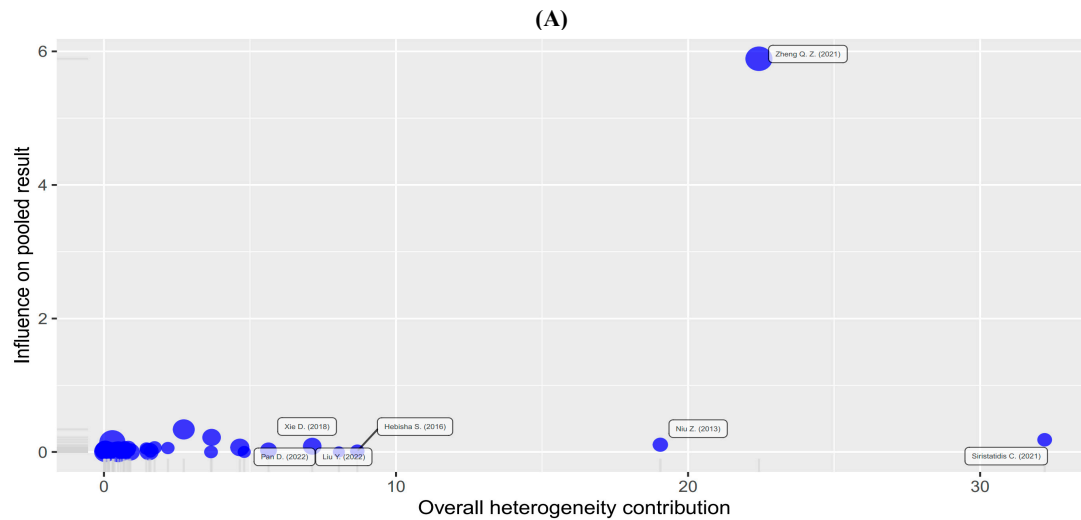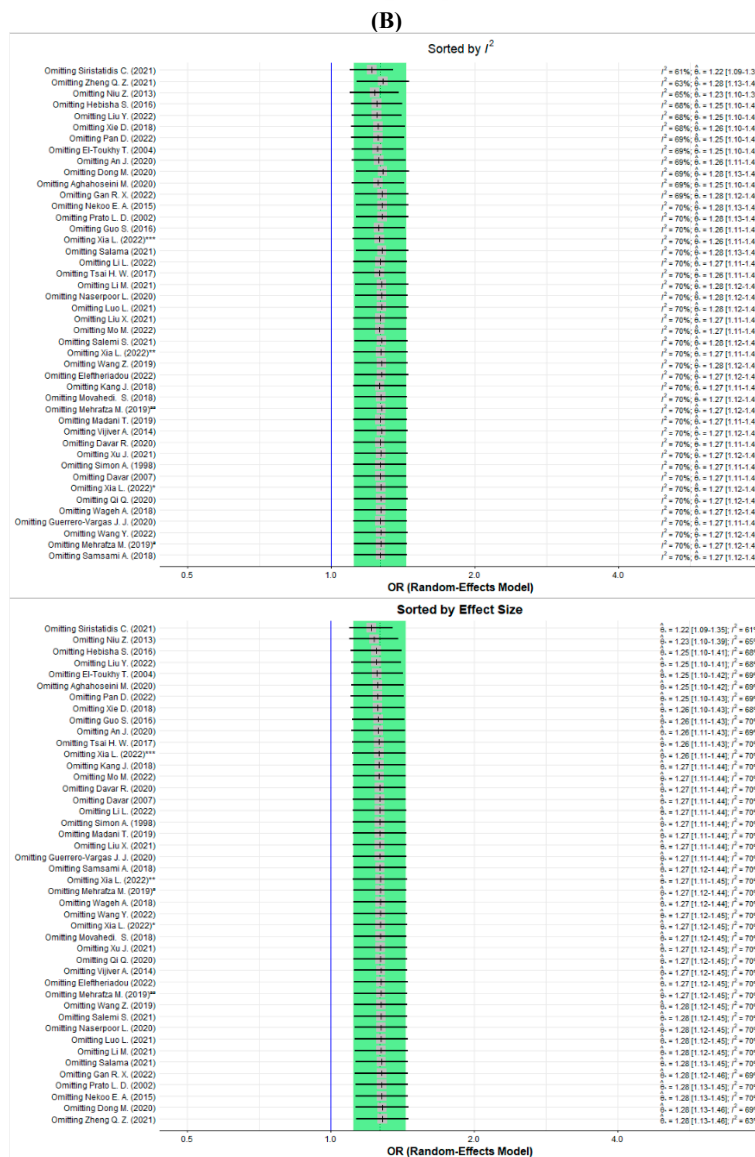

**Supplementary Figure S1: Baujat plot for sources of heterogeneity in overall infertile population (Clinical Pregnancy Rate). (A) Baujat plot (B) Leave-One-Out Meta-Analysis Results sorted by  $I^2$  and Effect Size**



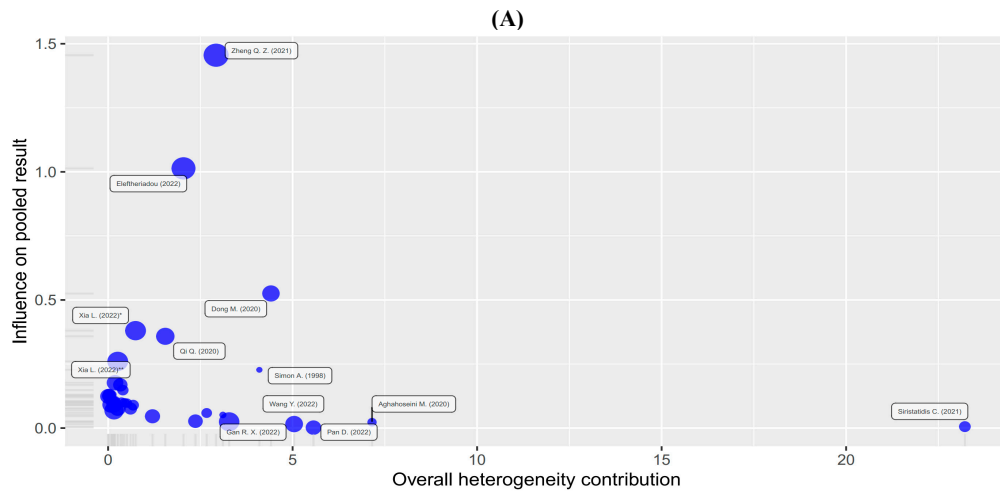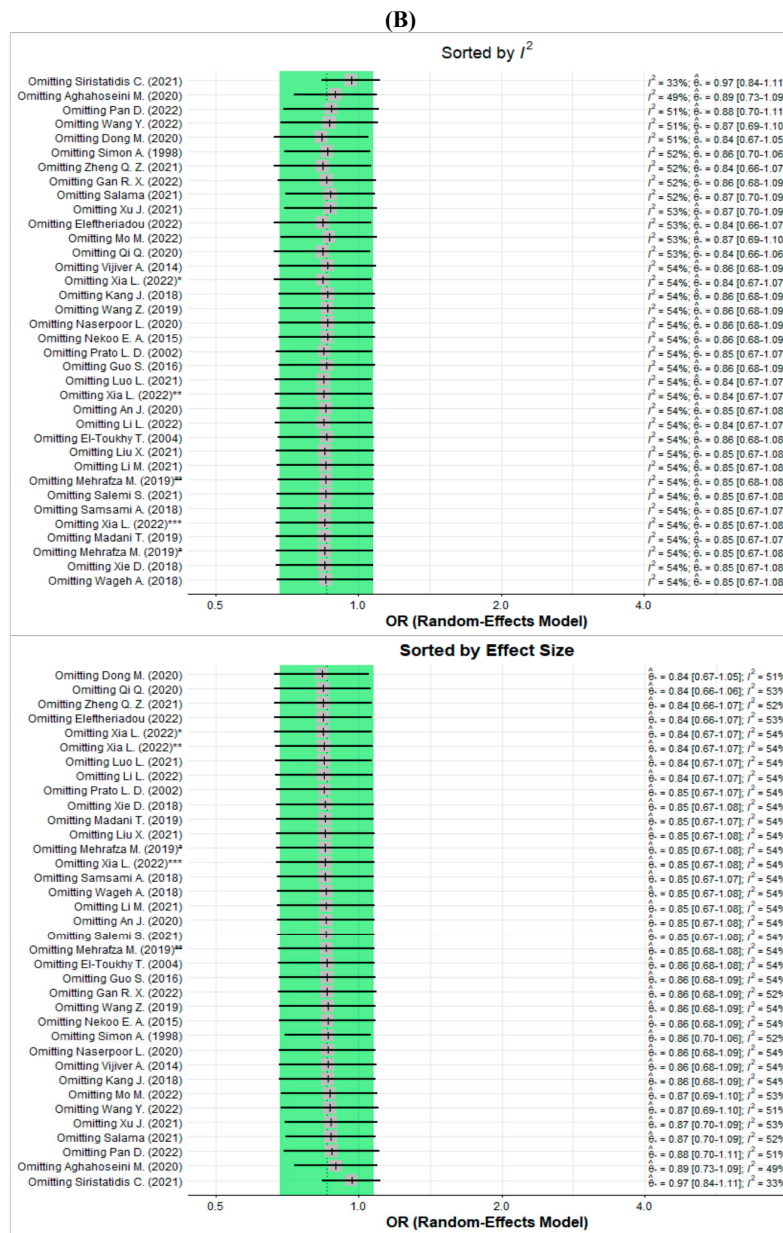

**Supplementary Figure S2: Baujat plot for sources of heterogeneity in overall infertile population (Miscarriage Rate).**  
**(A) Baujat plot (B) Leave-One-Out Meta-Analysis Results sorted by  $I^2$  and Effect Size**

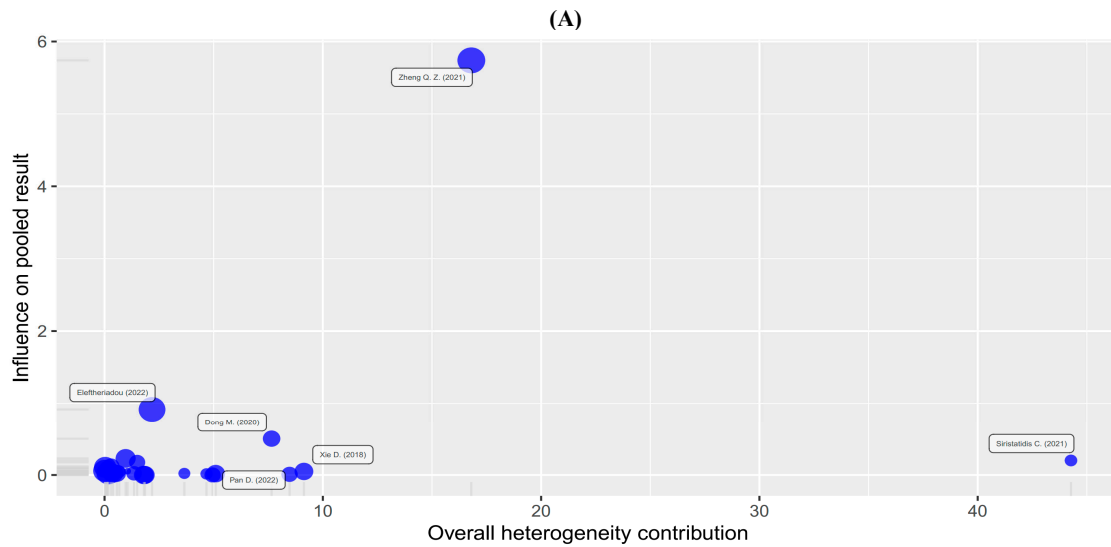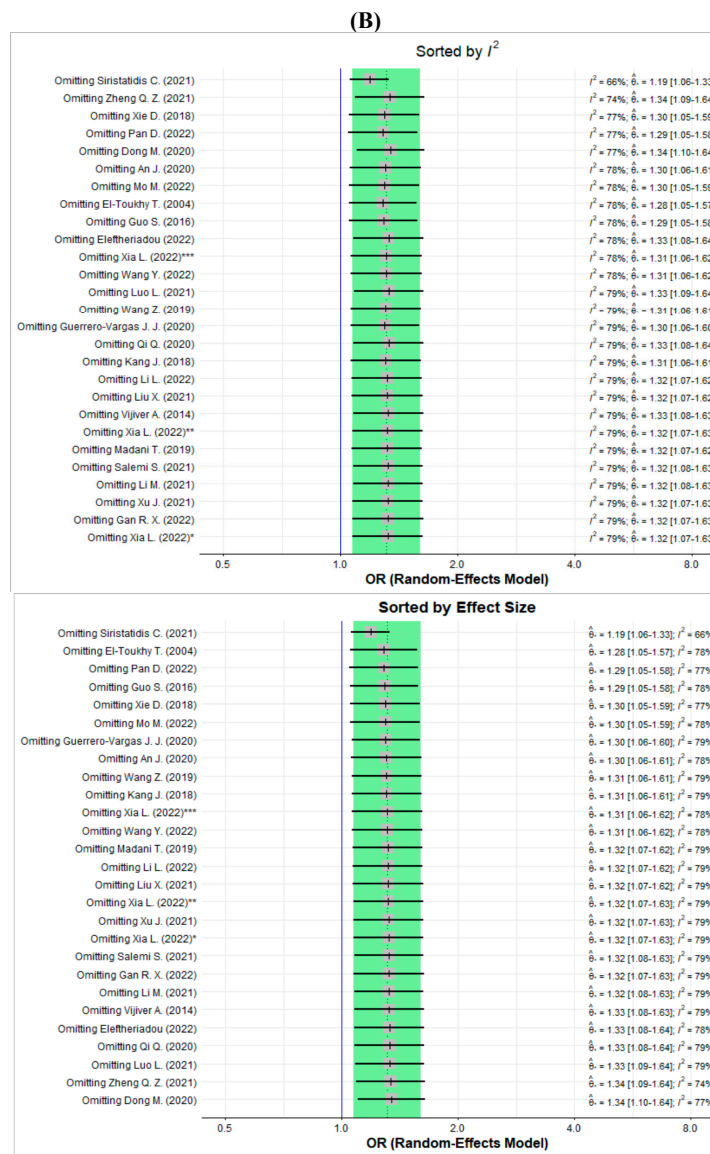

**Supplementary Figure S3: Baujat plot for sources of heterogeneity in overall infertile population (Live Birth Rate).**  
**(A) Baujat plot (B) Leave-One-Out Meta-Analysis Results sorted by  $I^2$  and Effect Size**

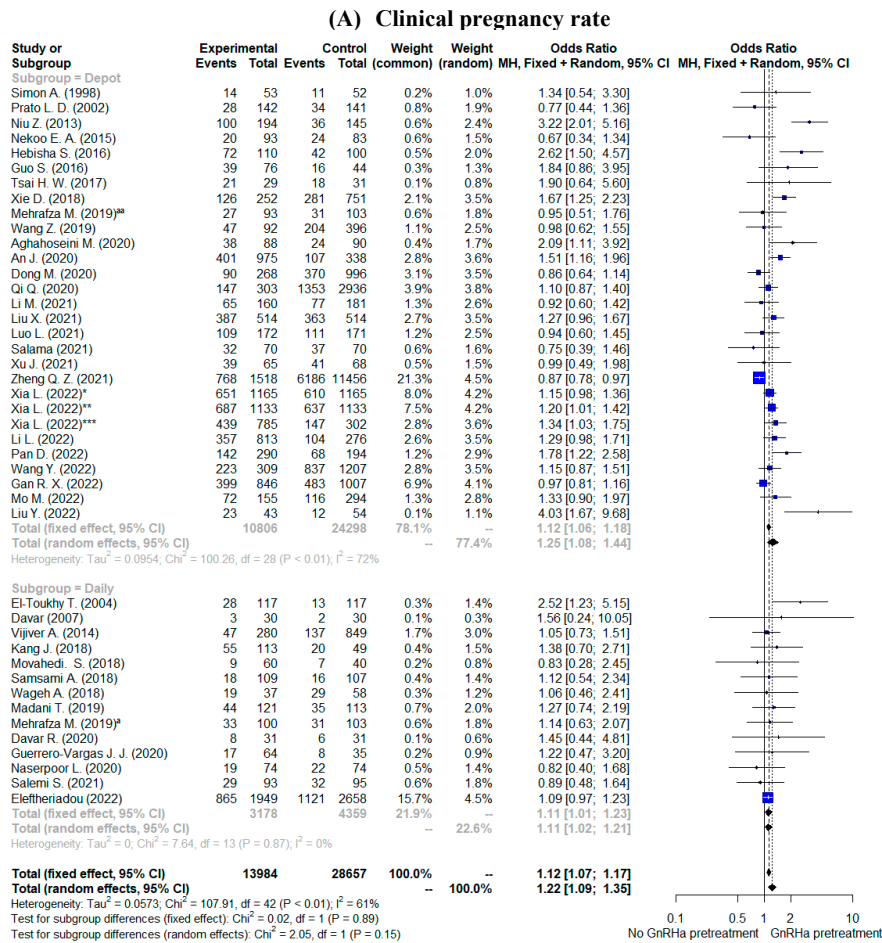

**Supplementary Figure S4:** Forest plots of meta-analysis for pregnancy outcomes following AC-FET cycles with and without GnRH pretreatment: subgroups of daily and depot GnRH protocols. **(A)** Clinical Pregnancy Rate. **(B)** Implantation Rate. **(C)** Live Birth Rate **(D)** Miscarriage Rate. \*, \*\*, and \*\*\*: three populations of infertile women were reported in the same study with matched or non-matched designs. a and aa: two different protocols were applied in the same study.

## (B) Implantation rate

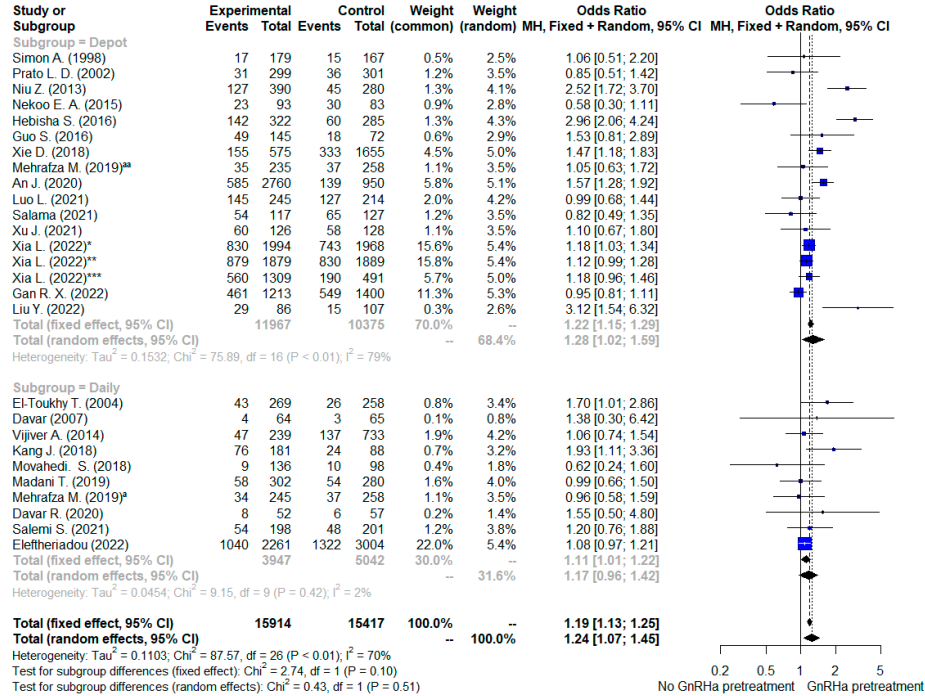

## (C) Live birth rate

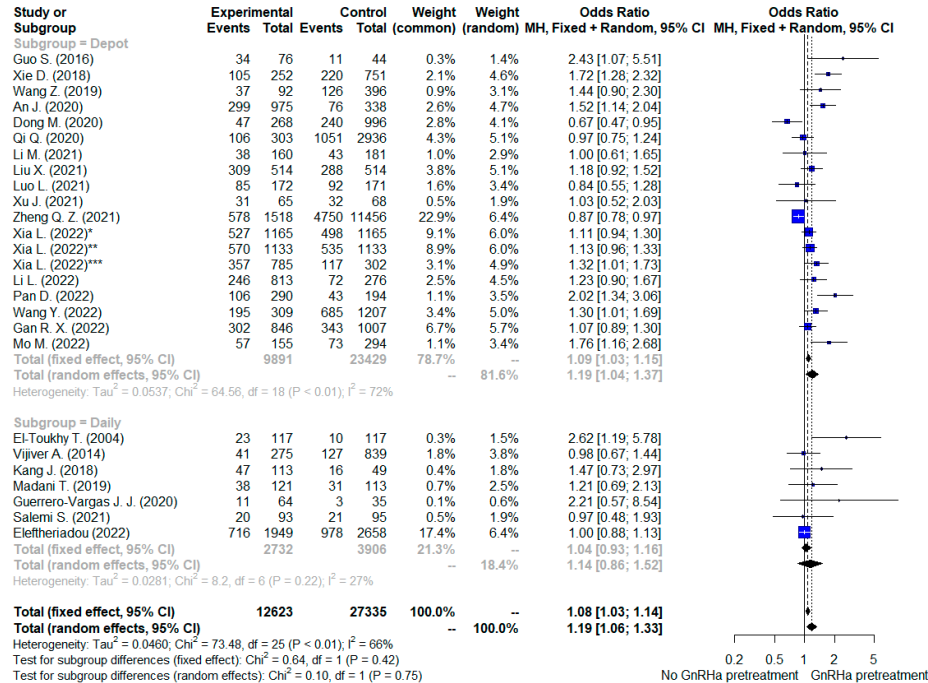

Supplementary Figure S4: (cont.)

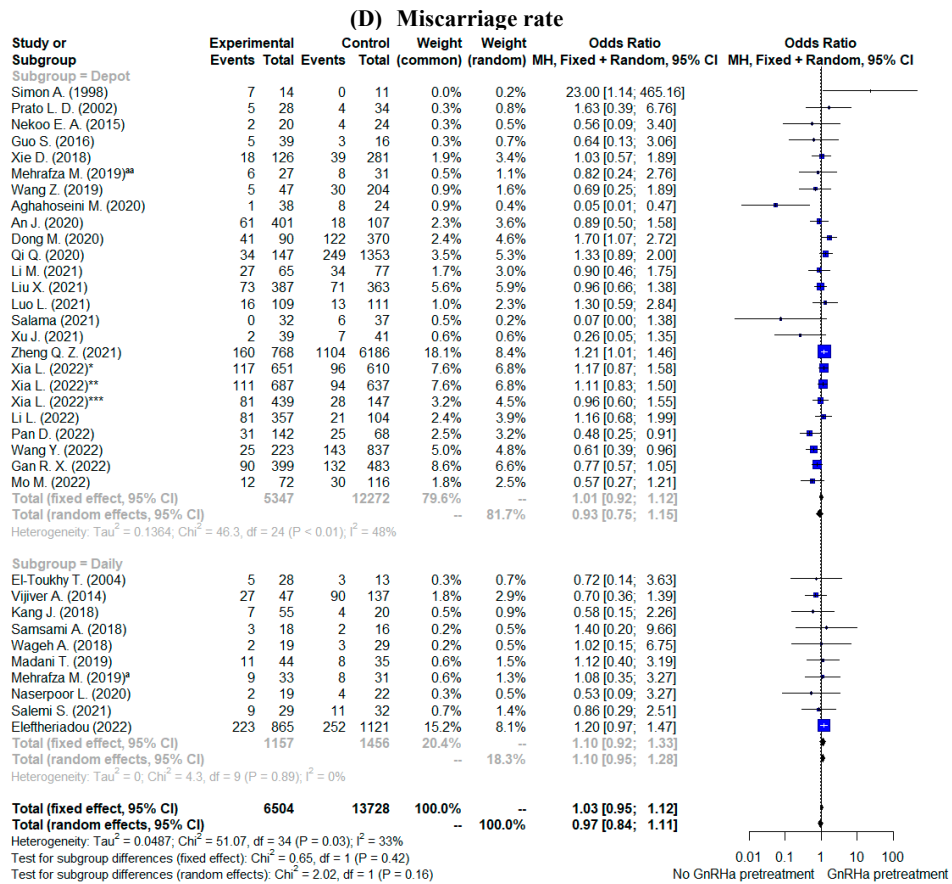

**Supplementary Figure S4: (cont.)**

(A) Clinical pregnancy rate

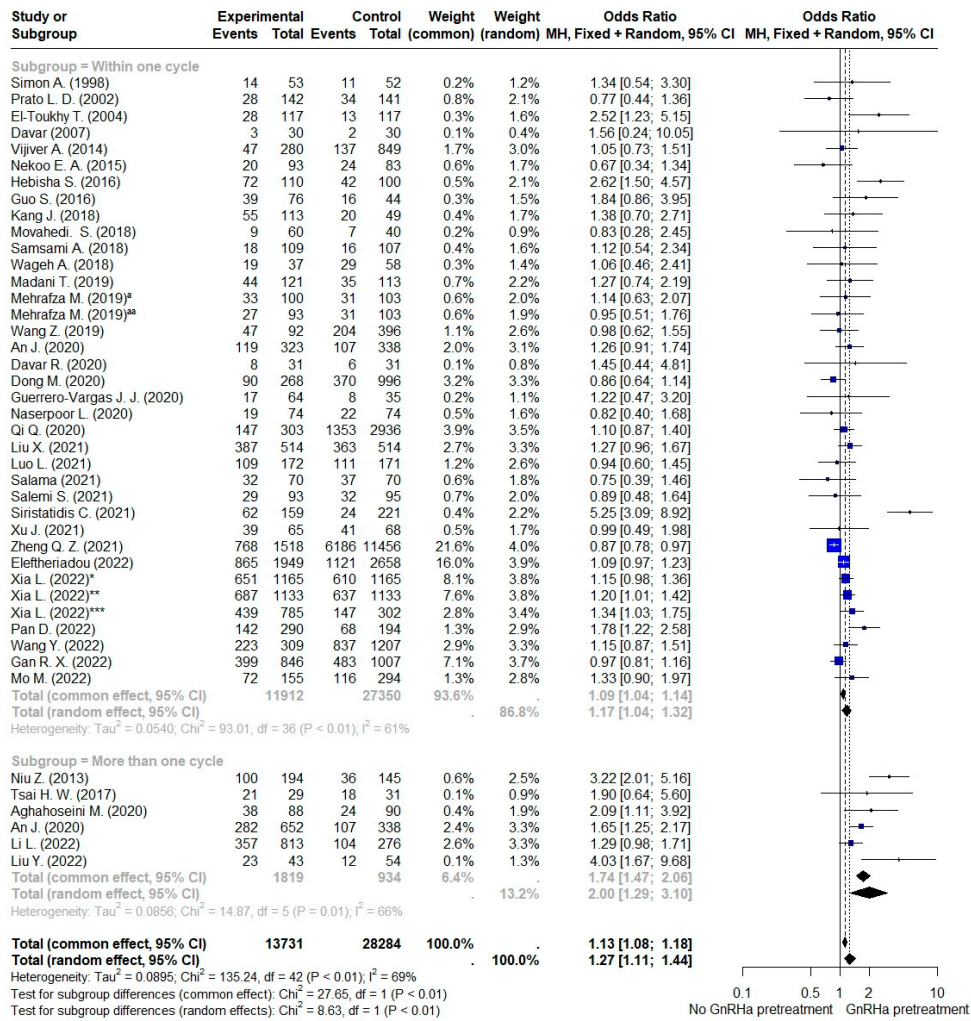

**Supplementary Figure S5:** Forest plots of meta-analysis for pregnancy outcomes following AC-FET cycles with and without GnRHa pretreatment: subgroups of GnRHa administration duration. **(A)** Clinical Pregnancy Rate. **(B)** Implantation Rate. **(C)** Live Birth Rate **(D)** Miscarriage Rate. \*, \*\*, and \*\*\*: three populations of infertile women were reported in the same study with matched or non-matched designs. a and aa: two different protocols were applied in the same study.



## (B) Implantation rate

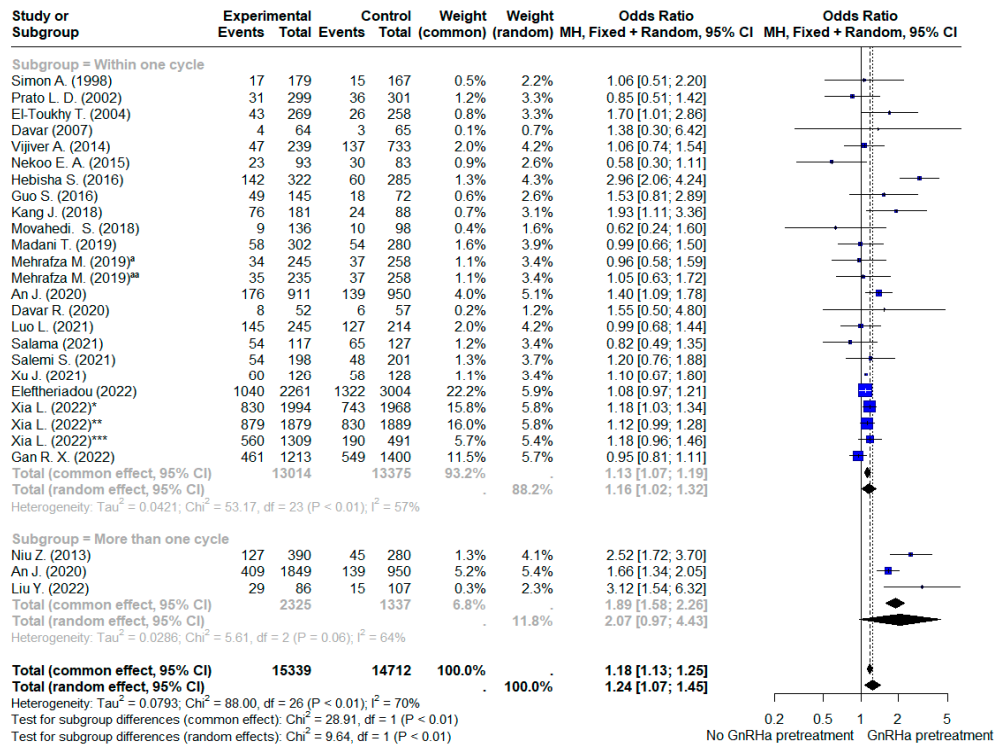

## (C) Live birth rate

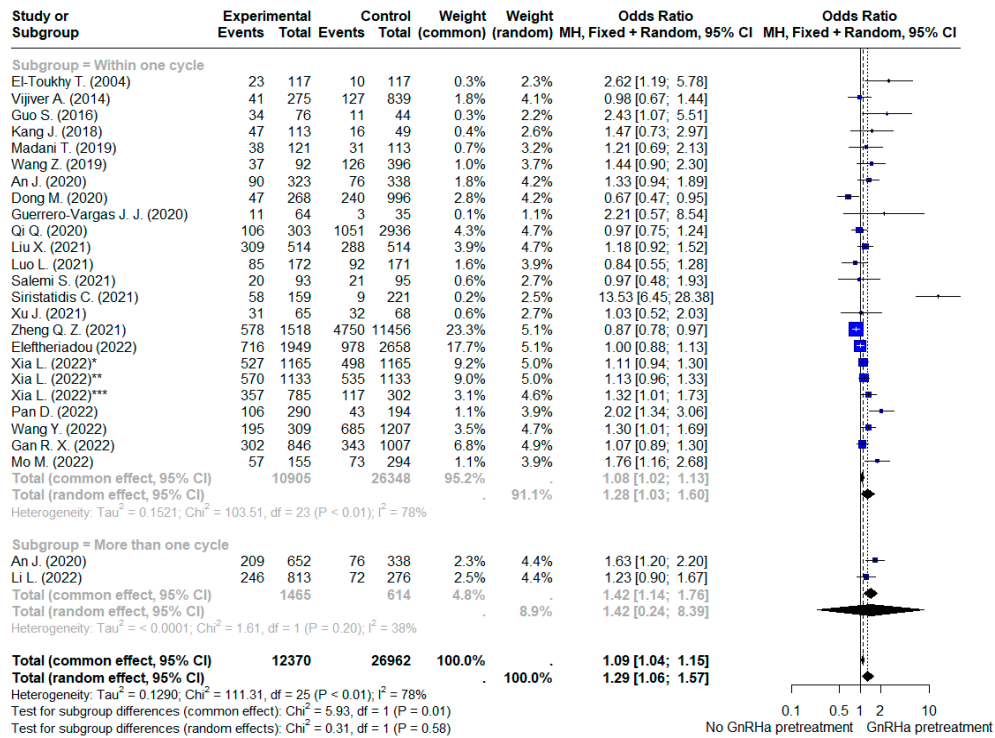

Supplementary Figure S5: (cont.)

(D) Miscarriage rate

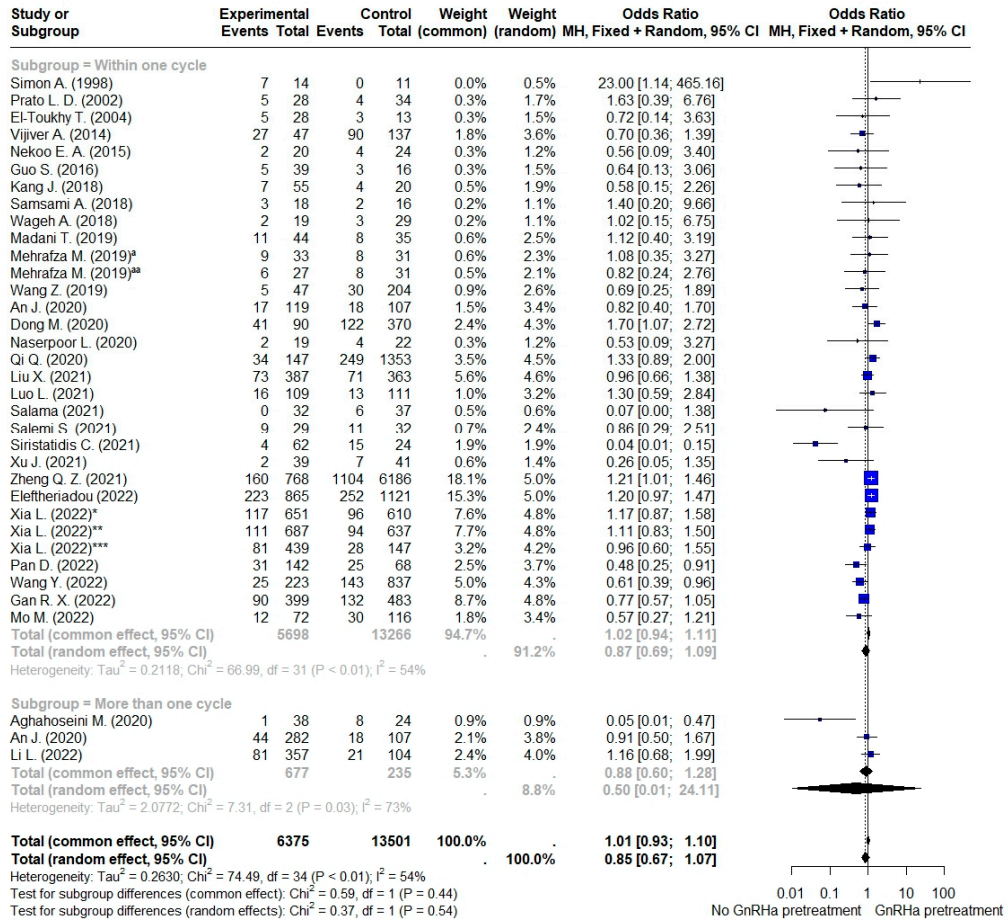

Supplementary Figure S5: (cont.)



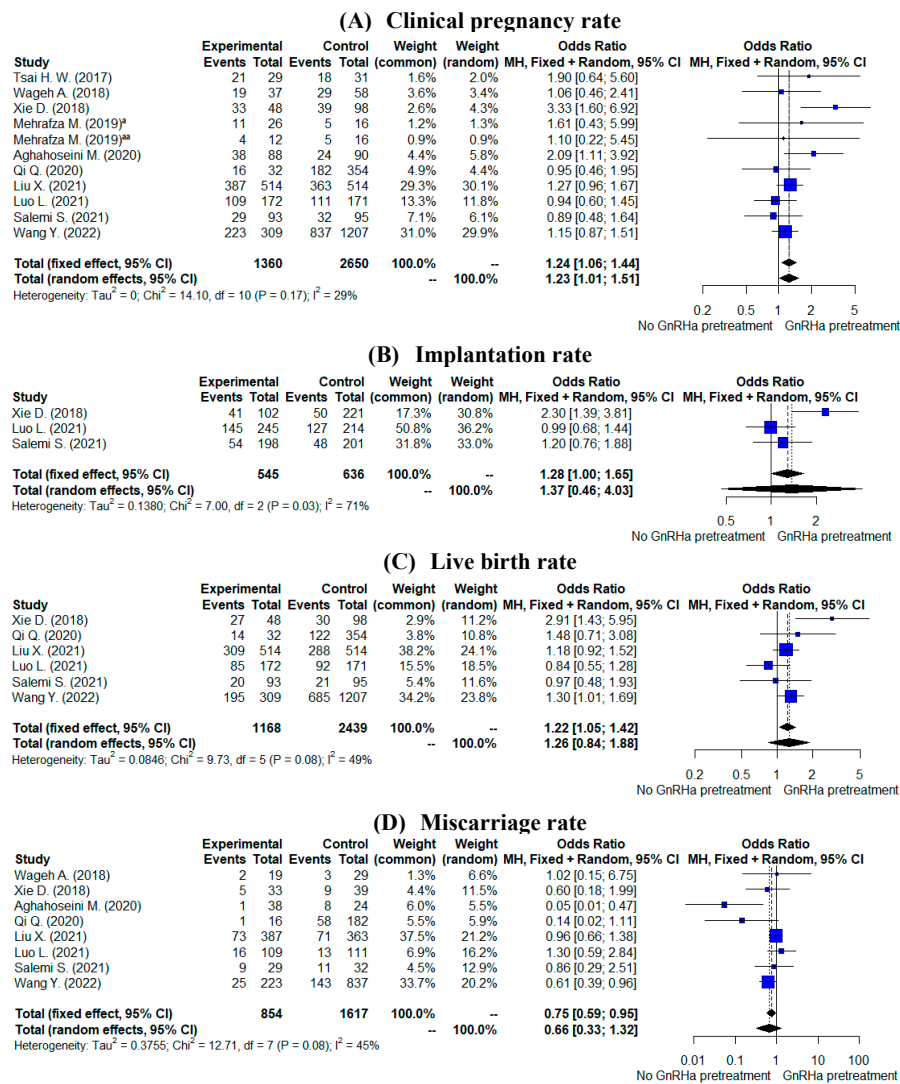

**Supplementary Figure S6:** Forest plots of meta-analysis for pregnancy outcomes following AC-FET cycles with and without GnRHa pretreatment in PCOS patients. **(A)** Clinical Pregnancy Rate. **(B)** Implantation Rate. **(C)** Live Birth Rate **(D)** Miscarriage Rate.

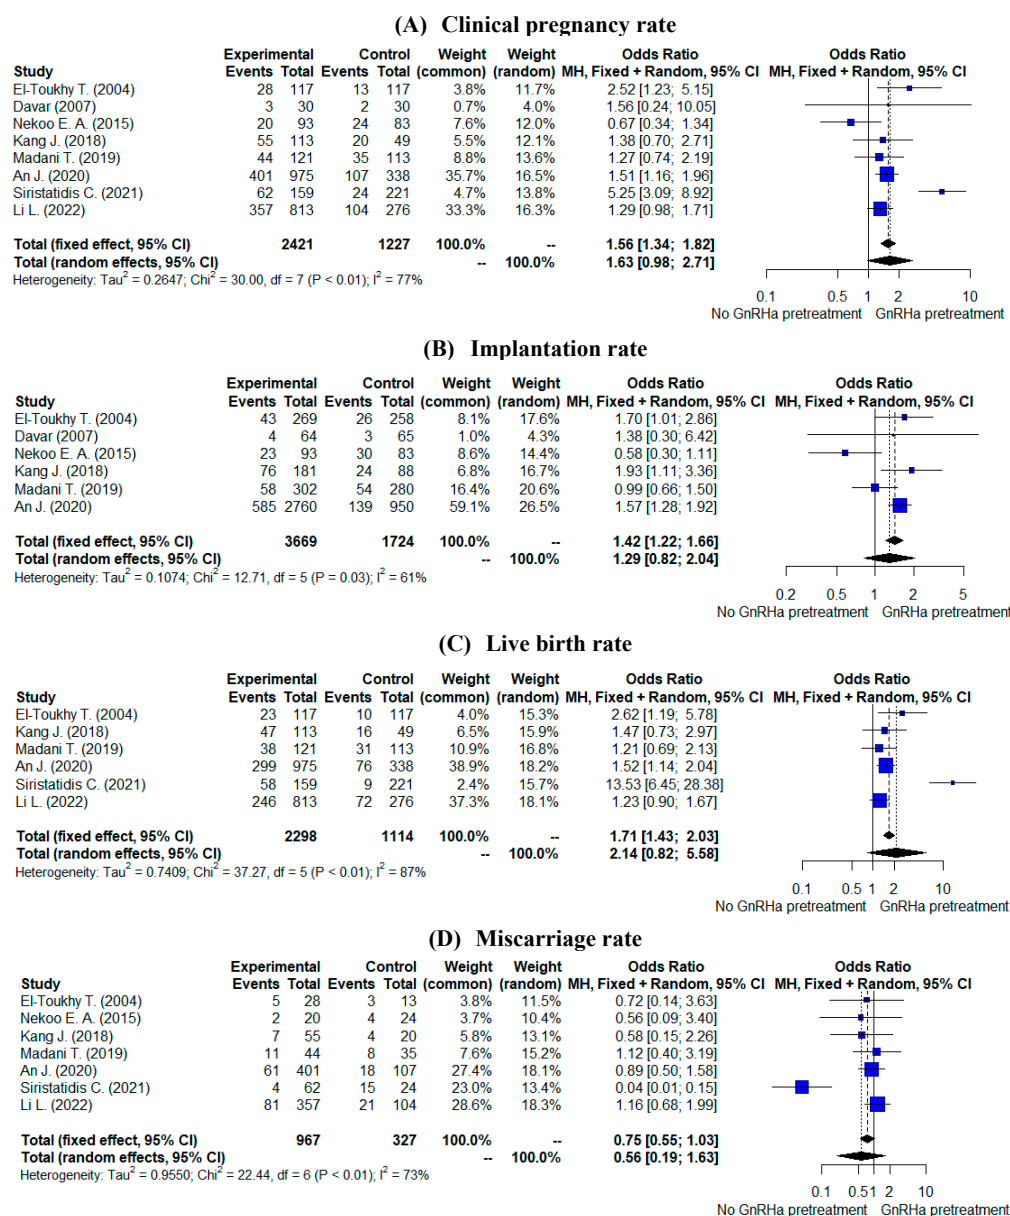

**Supplementary Figure S7:** Forest plots of meta-analysis for pregnancy outcomes following AC-FET cycles with and without GnRHa pretreatment in ovulatory women with regular cycles. **(A)** Clinical Pregnancy Rate. **(B)** Implantation Rate. **(C)** Live Birth Rate **(D)** Miscarriage Rate.
